# Supplementary material
Source: MDPI journal article supplement (https://www.mdpi.com/2077-0472/9/12/252)
Supplement: s1 [file s1]

Table S1. Experimental site meteorological data.

|               | <b>Rainfall</b> | <b>Minimum temp.</b> | <b>Maximum temp.</b> | <b>Relative humidity</b> | <b>Wind</b>  |
|---------------|-----------------|----------------------|----------------------|--------------------------|--------------|
|               | <b>(mm)</b>     | <b>(°C)</b>          | <b>(°C)</b>          | <b>(%)</b>               | <b>(m/s)</b> |
| <b>Year 1</b> |                 |                      |                      |                          |              |
| January       | 88.0            | 2.3                  | 10.9                 | 82.0                     | 1.3          |
| February      | 113.2           | 2.8                  | 12.5                 | 74.0                     | 1.8          |
| March         | 70.6            | 4.6                  | 14.2                 | 70.0                     | 2.0          |
| April         | 1.8             | 6.8                  | 21.9                 | 56.0                     | 1.5          |
| May           | 69.4            | 10.1                 | 23.6                 | 61.0                     | 1.2          |
| June          | 40.2            | 13.9                 | 28.0                 | 52.0                     | 1.5          |
| July          | 0.8             | 14.2                 | 32.4                 | 34.0                     | 1.8          |
| August        | 48.0            | 14.8                 | 29.6                 | 48.0                     | 1.5          |
| September     | 47.0            | 10.1                 | 24.2                 | 51.0                     | 1.8          |
| October       | 47.6            | 8.3                  | 18.8                 | 62.0                     | 1.4          |
| November      | 37.0            | 2.4                  | 12.2                 | 70.0                     | 1.6          |
| December      | 59.8            | 0.4                  | 8.3                  | 74.0                     | 1.9          |
| <b>Year 2</b> |                 |                      |                      |                          |              |
| January       | 95.6            | 2.3                  | 9.9                  | 79.0                     | 1.6          |
| February      | 36.8            | 0.9                  | 11.5                 | 68.0                     | 1.4          |
| March         | 119.2           | 3.6                  | 13.1                 | 75.0                     | 2.0          |
| April         | 118.8           | 6.2                  | 17.2                 | 68.0                     | 2.5          |
| May           | 82.0            | 9.8                  | 22.8                 | 65.0                     | 1.4          |
| June          | 116.2           | 14.2                 | 27.2                 | 67.0                     | 1.1          |
| July          | 22.6            | 14.5                 | 30.3                 | 52.0                     | 1.6          |
| August        | 12.4            | 14.8                 | 31.8                 | 48.0                     | 1.6          |
| September     | 60.8            | 11.0                 | 24.1                 | 61.0                     | 1.7          |
| October       | 38.8            | 9.7                  | 21.2                 | 71.0                     | 1.6          |
| November      | 156.2           | 5.2                  | 13.5                 | 83.0                     | 1.6          |
| December      | 173.6           | 1.6                  | 8.0                  | 85.0                     | 1.8          |
| <b>Year 3</b> |                 |                      |                      |                          |              |
| January       | 62.8            | 1.3                  | 8.5                  | 82.0                     | 1.7          |
| February      | 57.4            | -0.3                 | 9.7                  | 73.0                     | 1.6          |
| March         | 110.4           | 2.5                  | 13.9                 | 71.0                     | 2.0          |
| April         | 77.6            | 7.0                  | 19.2                 | 73.0                     | 1.4          |
| May           | 52.2            | 9.9                  | 25.7                 | 60.0                     | 1.2          |
| June          | 55.6            | 12.6                 | 25.8                 | 63.0                     | 1.7          |
| July          | 9.8             | 15.2                 | 31.0                 | 53.0                     | 0.9          |
| August        | 26.8            | 16.5                 | 32.2                 | 54.0                     | 1.1          |
| September     | 50.6            | 14.3                 | 26.0                 | 62.0                     | 2.2          |
| October       | 41.8            | 6.8                  | 19.2                 | 69.0                     | 2.0          |
| November      | 82.6            | 4.5                  | 14.5                 | 88.0                     | 0.9          |
| December      | 109.0           | 2.6                  | 9.7                  | 86.0                     | 1.9          |
| <b>Year 4</b> |                 |                      |                      |                          |              |
| January       | 176.2           | 0.6                  | 7.2                  | 85.0                     | 1.9          |
| February      | 143.8           | 2.0                  | 10.1                 | 82.0                     | 1.6          |
| March         | 37.2            | 3.0                  | 13.6                 | 72.0                     | 1.9          |
| April         | 80.4            | 5.3                  | 18.3                 | 71.0                     | 1.9          |
| May           | 142.0           | 9.5                  | 20.6                 | 77.0                     | 1.1          |
| June          | 55.0            | 12.4                 | 26.3                 | 62.0                     | 1.2          |
| July          | 27.2            | 16.2                 | 31.2                 | 52.0                     | 1.4          |
| August        | 44.6            | 15.2                 | 29.2                 | 60.0                     | 1.1          |
| September     | 101.2           | 11.5                 | 24.1                 | 69.0                     | 1.2          |
| October       | 55.2            | 8.2                  | 18.0                 | 78.0                     | 1.6          |
| November      | 247.8           | 5.9                  | 13.8                 | 89.0                     | 1.1          |
| December      | 99.6            | 1.7                  | 8.9                  | 82.0                     | 1.9          |
